# Supplementary material
Source: Springer Nature journal article supplement (https://www.springerprofessional.de/resource/supplementary/13638_2014_963_MOESM8_ESM.pdf/11898886)

# Delivery Probability

- Message delivery based reputation system
- Acknowledgement system

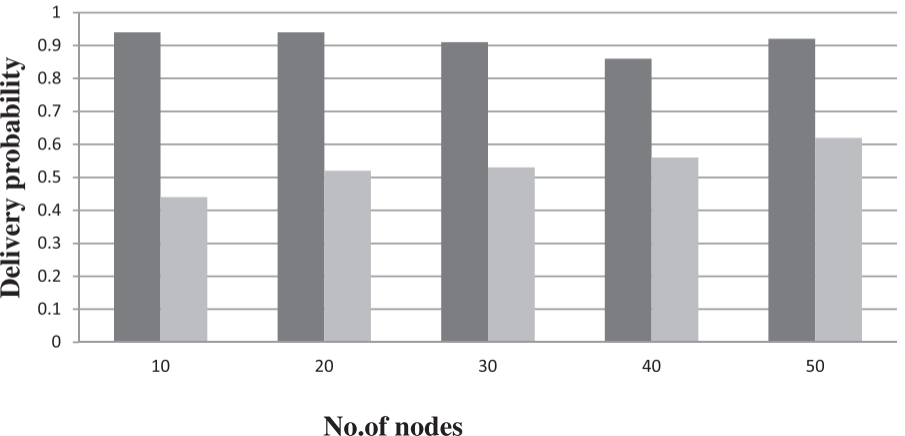

Supplement: MOESM8 [file 11898886]
